# Supplementary material for: Mirror Mechanism Behind Visual–Auditory Interaction: Evidence From Event-Related Potentials in Children With Cochlear Implants
Source: Frontiers journal article supplement (doi:10.3389/fnins.2021.692520), 2021-08-24
Supplement: Data_Sheet_1.pdf [file Data_Sheet_1.pdf]

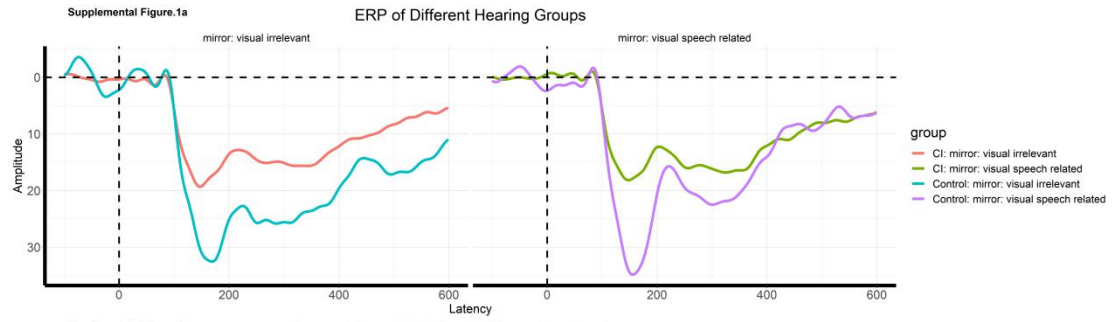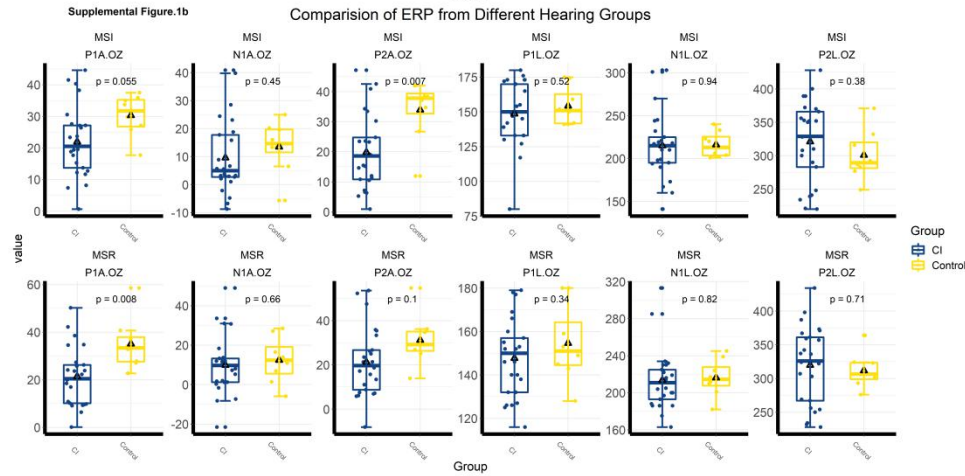

Supplemental table 1: Anova Test Result

| Component | Compare_between | Df | F.value | Pr..F. |
|-----------|-----------------|----|---------|--------|
| P1A.OZ    | STM             | 1  | 0.07    | 0.8    |
| P1A.OZ    | Group           | 1  | 11.9    | 0*     |
| P1A.OZ    | STM:Group       | 1  | 0.7     | 0.41   |
| N1A.OZ    | STM             | 1  | 0       | 0.98   |
| N1A.OZ    | Group           | 1  | 0.7     | 0.41   |
| N1A.OZ    | STM:Group       | 1  | 0.03    | 0.86   |
| P2A.OZ    | STM             | 1  | 0.02    | 0.9    |
| P2A.OZ    | Group           | 1  | 9.81    | 0*     |
| P2A.OZ    | STM:Group       | 1  | 0.29    | 0.59   |
| P1L.OZ    | STM             | 1  | 0.02    | 0.89   |
| P1L.OZ    | Group           | 1  | 1.26    | 0.27   |
| P1L.OZ    | STM:Group       | 1  | 0.01    | 0.91   |
| N1L.OZ    | STM             | 1  | 0.02    | 0.88   |
| N1L.OZ    | Group           | 1  | 0.04    | 0.84   |
| N1L.OZ    | STM:Group       | 1  | 0.01    | 0.93   |
| P2L.OZ    | STM             | 1  | 0.01    | 0.9    |
| P2L.OZ    | Group           | 1  | 0.82    | 0.37   |
| P2L.OZ    | STM:Group       | 1  | 0.15    | 0.7    |

\*: p.value < 0.05. Since there existing no interaction between STM & Group in each ERP component, we could do anova test on STM level with Group as factor, which was shown in Supplemental Figure.1b.

Supplemental Figure 2

CI vs Control: Mirror  
speech related stimuli

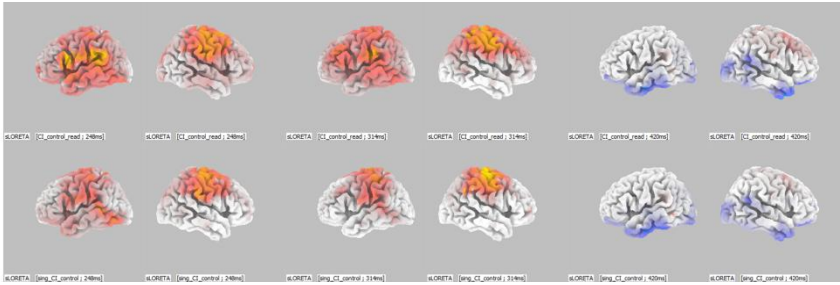

CI vs Control: Mirror  
speech irrelevant stimuli

Supplemental Table 1

| Groups in<br>comparison | Component | Top5 BA of ERP difference source |    |    |    |    |
|-------------------------|-----------|----------------------------------|----|----|----|----|
|                         |           |                                  |    |    |    |    |
| MSR                     | P1        | 40                               | 2  | 13 | 42 | 22 |
|                         | N1        | 40                               | 3  | 2  | 5  | 7  |
|                         | P2        | 36                               | 20 | 35 | 28 | 34 |
| MSI                     | P1        | 4                                | 3  | 40 | 2  | 11 |
|                         | N1        | 6                                | 4  | 3  | 1  | 2  |
|                         | P2        | 36                               | 20 | 35 | 28 | 34 |
