# Supplementary material for: Mirror Mechanism Behind Visual–Auditory Interaction: Evidence From Event-Related Potentials in Children With Cochlear Implants
Source: Frontiers journal article supplement (doi:10.3389/fnins.2021.692520), 2021-08-24
Supplement: Image_1.pdf [file Image_1.pdf]

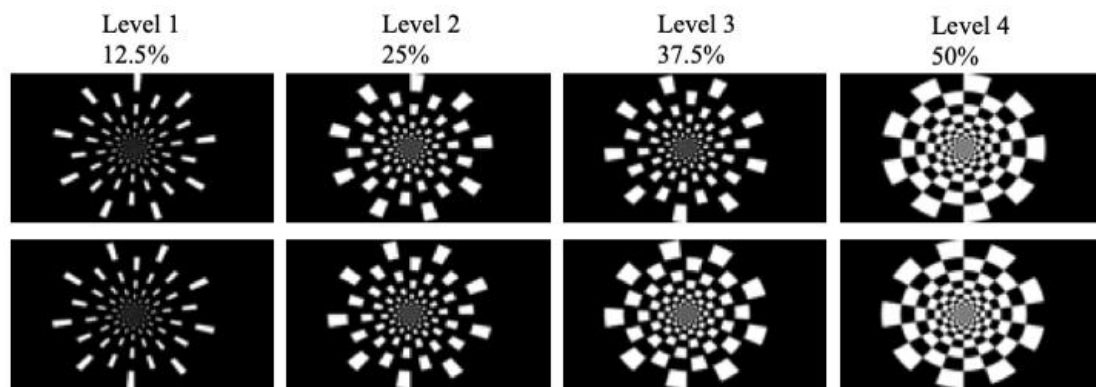

Supplementary Figure1. Checkerboard stimuli

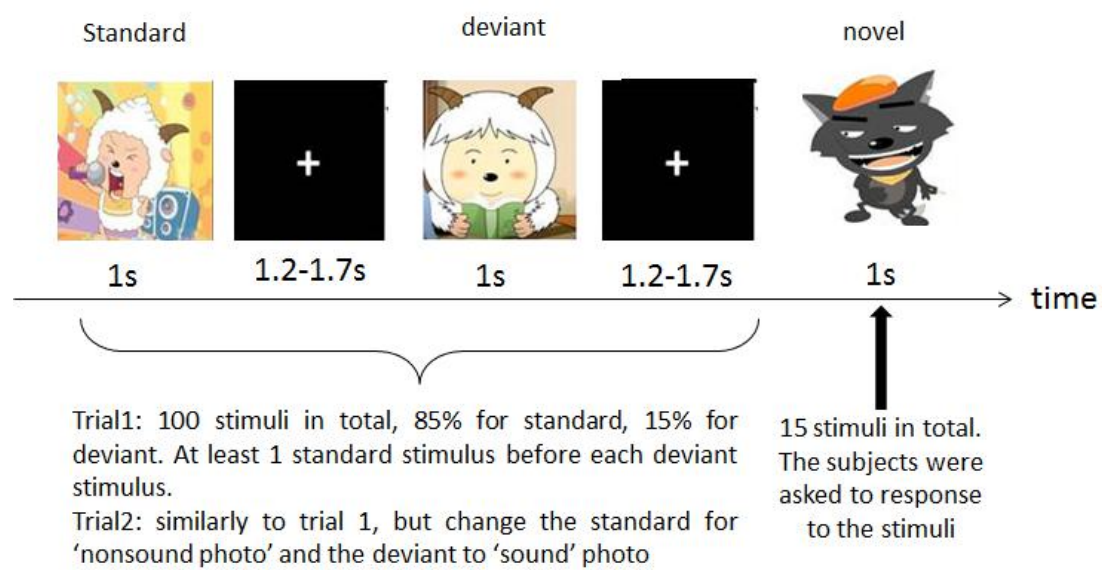

Supplementary Figure 2
